# Supplementary material for: Phylogenetic Analysis of Massilia phlebovirus in Portugal
Source: MDPI journal article supplement (doi:10.3390/v13071412), 2021-07-20
Supplement: s1 [file s1]

**Table S1. Phleboviruses' sequence data**

| Sample ID                             | Species designation<br>ICTV2020 <sup>¶</sup> | GenBank<br>Accession | L Seg | Country first<br>isolated/detected | Year | Isolation<br>Source 1 | Isolation Source 2                      | Reference                                                                                        |
|---------------------------------------|----------------------------------------------|----------------------|-------|------------------------------------|------|-----------------------|-----------------------------------------|--------------------------------------------------------------------------------------------------|
| Massilia PoSFPhebV/21/2007            | <i>Massilia phlebovirus</i>                  | MW448252             |       | Portugal                           | 2007 | Sandflies             | Phlebotomine sandflies                  | This work                                                                                        |
| Massilia PoSFPhebV/70/2007            | <i>Massilia phlebovirus</i>                  | MW448255             |       | Portugal                           | 2007 | Sandflies             | Phlebotomine sandflies                  | This work                                                                                        |
| Arrabida virus                        | <i>Naples phlebovirus</i> *                  | KP863799             |       | Portugal                           | 2008 | Sandflies             | Phlebotomine sandflies                  | <a href="https://doi.org/10.1016/j.virusres.2016.01.004">DOI: 10.1016/j.virusres.2016.01.004</a> |
| Massilia_127                          | <i>Massilia phlebovirus</i>                  | KT906098             |       | Portugal                           | 2008 | Sandflies             | Phlebotomine sandflies                  | <a href="https://doi.org/10.1186/s12985-015-0407-0">DOI: 10.1186/s12985-015-0407-0</a>           |
| Massilia_130                          | <i>Massilia phlebovirus</i>                  | KT906099             |       | Portugal                           | 2008 | Sandflies             | Phlebotomine sandflies                  | <a href="https://doi.org/10.1186/s12985-015-0407-0">DOI: 10.1186/s12985-015-0407-0</a>           |
| Massilia_W                            | <i>Massilia phlebovirus</i>                  | EU725771             |       | France                             | 2005 | Sandflies             | <i>Phlebotomus perniciosus</i>          | <a href="https://doi.org/10.1089/vbz.2008.0131">DOI: 10.1089/vbz.2008.0131</a>                   |
| Granada_GR25                          | <i>Naples phlebovirus</i> *                  | GU135606             |       | Spain                              | 2004 | Sandflies             | <i>Phlebotomine sandflies</i>           | <a href="https://doi.org/10.4269/ajtmh.2010.09-0697">DOI: 10.4269/ajtmh.2010.09-0697</a>         |
| Punique_PI_B4                         | <i>Punique phlebovirus</i>                   | JF920133             |       | Tunisia                            | 2008 | Sandflies             | <i>Ph. perniciosus, Ph. longicuspis</i> | <a href="https://doi.org/10.1099/vir.0.056614-0">DOI: 10.1099/vir.0.056614-0</a>                 |
| Toscana_H4906                         | <i>Toscana phlebovirus</i>                   | KU922127             |       | France                             | 2004 | Human                 | <i>Homo sapiens</i>                     | <a href="https://doi.org/10.1128/genomeA.00454-16">DOI: 10.1128/genomeA.00454-16</a>             |
| Toscana_T152                          | <i>Toscana phlebovirus</i>                   | JX867534             |       | Tunisia                            | 2010 | Sandflies             | <i>Phlebotomus</i> sp.                  | <a href="https://doi.org/10.3201/eid1902.121463">DOI: 10.3201/eid1902.121463</a>                 |
| Toscana_EsPHGR40                      | <i>Toscana phlebovirus</i>                   | FJ153280             |       | Spain                              | 2004 | Sandflies             | <i>Phlebotomus</i> sp.                  | <a href="https://doi.org/10.3201/eid1504.081111">DOI: 10.3201/eid1504.081111</a>                 |
| Sandfly_Fever_Naples                  | <i>Naples phlebovirus</i>                    | HM566172             |       | Italy                              | 1944 | Human                 | <i>Homo sapiens</i>                     | <a href="https://doi.org/10.1099/vir.0.056614-0">DOI: 10.1099/vir.0.056614-0</a>                 |
| Naples_Sabin                          | <i>Naples phlebovirus</i>                    | JF939843             |       | Italy                              | 1944 | Human                 | <i>Homo sapiens</i>                     |                                                                                                  |
| Sand_fever_Naples_like_strain Poona   | <i>Naples phlebovirus</i>                    | HM566176             |       | India                              | 1971 | Human                 | <i>Homo sapiens</i>                     |                                                                                                  |
| Gordil_virus_isolate_Dak_ANBr 496d    | <i>Gordil phlebovirus</i>                    | KF297900             |       | Central African<br>Republic        | 1984 | Mouse                 | <i>Lemniscomys striatus</i>             | <a href="https://doi.org/10.1099/vir.0.056614-0">DOI: 10.1099/vir.0.056614-0</a>                 |
| Tehran_virus_strain_I-47              | <i>Tehran phlebovirus</i>                    | JF939846             |       | Iran                               | 1976 | Sandflies             | <i>Phlebotomus perfiliewi</i>           | <a href="https://doi.org/10.1099/vir.0.056614-0">DOI: 10.1099/vir.0.056614-0</a>                 |
| Saint_Floris_virus_strain_Dak_ANB 512 | <i>Saint Floris phlebovirus</i>              | JF920136             |       | Central African<br>Republic        | 1971 | Mouse                 | <i>Tatera</i> sp.                       | <a href="https://doi.org/10.1099/vir.0.056614-0">DOI: 10.1099/vir.0.056614-0</a>                 |
| Mukawa_virus_isolate_MKW73            | <i>Mukawa phlebovirus</i>                    | LC063770             |       | Japan                              | 2013 | Tick                  | <i>Ixodes persulcatus</i>               | <a href="https://doi.org/10.1128/mSphere.00239-18">DOI: 10.1128/mSphere.00239-18</a>             |
| Zerdali_virus_strain_37               | <i>Zerdali phlebovirus</i>                   | NC_029901            |       | Turkey                             | 2012 | Sandflies             | <i>Phlebotomus</i> sp.                  | <a href="https://doi.org/10.1371/journal.pntd.0004519">DOI: 10.1371/journal.pntd.0004519</a>     |
| Alcube_virus_S20                      | <i>Alcube phlebovirus</i>                    | KR363190             |       | Portugal                           | 2007 | Sandflies             | <i>Phlebotomine sandflies</i>           | <a href="https://doi.org/10.1186/s12985-015-0407-0">DOI: 10.1186/s12985-015-0407-0</a>           |
| Medjerda_Valley_virus_strain_T131     | <i>Medjerda phlebovirus</i>                  | KU255114             |       | Tunisia                            | 2010 | Sandflies             | <i>Phlebotomus</i> sp.                  | <a href="https://doi.org/10.1099/jgv.0.000389">DOI: 10.1099/jgv.0.000389</a>                     |
| Salehabad_virus_strain_I-81           | <i>Salehabad phlebovirus</i>                 | JX472403             |       | Iran                               | 1959 | Sandflies             | <i>Phlebotomus</i> sp.                  | <a href="https://doi.org/10.1099/vir.0.048850-0">DOI: 10.1099/vir.0.048850-0</a>                 |
| Adana_virus_strain_195                | <i>Adana phlebovirus</i>                     | KJ939330             |       | Turkey                             | 2012 | Sandflies             | <i>Phlebotomus</i> sp.                  | <a href="https://doi.org/10.1128/JVI.03027-14">DOI: 10.1128/JVI.03027-14</a>                     |
| Arumowot_virus                        | <i>Arumowot phlebovirus</i>                  | HM566144             |       | Sudan                              | 1963 | Mosquitoes            | <i>Culex antennatus</i>                 | <a href="https://doi.org/10.1099/vir.0.048850-0">DOI: 10.1099/vir.0.048850-0</a>                 |
| Arumowot_virus_isolate_Ar_1286-64     | <i>Arumowot phlebovirus</i>                  | MF593931             |       | Sudan                              | 1963 | Mosquitoes            | <i>Culex antennatus</i>                 | <a href="https://doi.org/10.1371/journal.pone.0185194">DOI: 10.1371/journal.pone.0185194</a>     |
| Odrenisrou_virus                      | <i>Odrenisrou phlebovirus</i>                | HM566174             |       | Ivory Coast                        | 1980 | Mosquitoes            | <i>Culex albiventris</i>                | <a href="https://doi.org/10.1099/vir.0.048850-0">DOI: 10.1099/vir.0.048850-0</a>                 |
| Salanga_virus_strain_AnB_904a         | <i>Salanga phlebovirus</i>                   | KC669549             |       | Central African<br>Republic        | 1971 | Rodent                | <i>Aethomys medicatus</i>               | <a href="https://doi.org/10.1371/journal.pone.0078470">DOI: 10.1371/journal.pone.0078470</a>     |

<sup>¶</sup> Archives of Virology (2020) 165:3023–3072; DOI:10.1007/s00705-020-04731-2

Reference and Genbank data differ. The data presented was retrieved from Genbank accession.

**Isolation Source 1** - common species/group name; **Isolation Source 2** - species assigned
