# Supplementary material for: Phylogenetic Analysis of Massilia phlebovirus in Portugal
Source: MDPI journal article supplement (doi:10.3390/v13071412), 2021-07-20
Supplement: s1 [file s1]

## Headings or Titles

**Table S1:** Phleboviruses' sequence data

**Table S2:** Estimates of evolutionary divergence between phleboviruses' RdRp amino acid sequences

**Table S3:** Estimates of evolutionary divergence between phleboviruses' glycoprotein precursor sequences

**Figure S1:** Schematic analysis of RDP most supported recombinant results

**File S1:** Phleboviruses' amino acid sequence alignment of L segments

**File S2:** Phleboviruses' nucleotide concatenated sequence alignment of all segments
